# Supplementary material for: Molecular basis of F-actin regulation and sarcomere assembly via myotilin
Source: bioRxiv or medRxiv preprint supplement (doi:10.1101/2020.09.25.310029), 2020-11-02
Supplement: Supplementary file [file media-3.pdf]

**Table S1: SAXS data collection, analysis and derived structural parameters**

| Construct                                               | Ig1Ig2 <sup>250-444*</sup>                              | Ig1Ig2 <sup>250-498</sup>   | Ig1Ig2 <sup>220-452</sup>                   | Trx-MYOT                                                     | Ig1Ig2 <sup>220-452<sup>†</sup></sup>                   | Ig1Ig2 <sup>220-452 R405K</sup> |
|---------------------------------------------------------|---------------------------------------------------------|-----------------------------|---------------------------------------------|--------------------------------------------------------------|---------------------------------------------------------|---------------------------------|
| Data collection parameters                              |                                                         |                             |                                             |                                                              |                                                         |                                 |
| Radiation source                                        | ESRF (Grenoble, France)                                 |                             | DESY (Hamburg, Germany)                     |                                                              |                                                         |                                 |
|                                                         |                                                         |                             | Doris                                       |                                                              | Petra III                                               |                                 |
| Beamline                                                | BM29 BioSAXS                                            |                             | EMBL X33                                    |                                                              | EMBL P12                                                |                                 |
| Detector                                                | Pilatus 1M                                              |                             | Pilatus 1M-W                                | Pilatus 2M                                                   |                                                         | Pilatus 6M                      |
| Beam geometry [mm, FWHM]                                | 0.10 × 0.20                                             |                             | n.d.                                        | 0.12 × 0.20                                                  |                                                         | 0.12 × 0.20                     |
| Wavelength [nm]                                         | 0.099                                                   |                             | 0.126                                       | 0.124                                                        |                                                         | 0.124                           |
| Sample–detector distance [m]                            | 2.867                                                   |                             | 2.7                                         | 3.1                                                          |                                                         | 3.0                             |
| Momentum of transfer <i>s</i> range [nm <sup>−1</sup> ] | 0.04–4.0                                                |                             | 0.1–6.0                                     | 0.08–3.5                                                     |                                                         | 0.15–7.3                        |
| Exposure time [s]                                       | 15                                                      |                             | 15                                          | 1 (SEC-SAXS)                                                 |                                                         | 0.145                           |
| Temperature [°C]                                        | 20                                                      |                             | 11                                          | 20                                                           |                                                         | 20                              |
| Buffer                                                  | 20 mM HEPES, 150 mM NaCl, 5% glycerol, 1 mM DTT, pH 7.4 |                             | 20 mM MES, 200 mM NaCl, 3% glycerol, pH 6.0 | 20 mM Tris 400 mM NaCl, 250 mM arginine, 5% glycerol, pH 7.5 | 20 mM HEPES, 150 mM NaCl, 5% glycerol, 1 mM DTT, pH 7.4 |                                 |
| Overall parameters                                      |                                                         |                             |                                             |                                                              |                                                         |                                 |
| Conc. range measured <sup>§</sup>                       | 1–14.12 mg/ml (0.05–0.64 mM)                            | 1–42.8 mg/ml (0.04–1.53 mM) | 1–52 mg/ml (0.04–1.96 mM)                   | n.a.                                                         | 2.1–36.6 mg/ml (0.08–1.38 mM)                           | 2.3–45.5 mg/ml (0.09–1.72 mM)   |
| <i>R<sub>g</sub></i> (Guinier) [Å]                      | 28 (0.64 mM)                                            | 32 (0.54 mM)                | 31 (0.04 mM)                                | 51                                                           | 30 (0.08 mM)                                            | 33 (0.09 mM)                    |
|                                                         |                                                         | 37 (1.53 mM)                | 37 (0.79 mM)                                |                                                              | 33 (0.19 mM)                                            | 34 (0.27 mM)                    |
|                                                         |                                                         |                             | 39 (1.96 mM)                                |                                                              | 33 (0.37 mM)                                            | 34 (0.47 mM)                    |
|                                                         |                                                         |                             |                                             |                                                              | 34 (0.69 mM)                                            | 35 (0.82 mM)                    |
|                                                         |                                                         |                             |                                             |                                                              | 36 (1.38 mM)                                            | 36 (1.72 mM)                    |
| <i>R<sub>g</sub></i> from PDDF [Å]                      | 29 (0.64 mM)                                            | 34 (0.54 mM)                | 32 (0.04 mM)                                | 53                                                           | 33 (0.08 mM)                                            | 34 (0.09 mM)                    |
|                                                         |                                                         | 38 (1.53 mM)                | 39 (0.79 mM)                                |                                                              | 34 (0.19 mM)                                            | 36 (0.27 mM)                    |
|                                                         |                                                         |                             | 41 (1.96 mM)                                |                                                              | 35 (0.37 mM)                                            | 36 (0.47 mM)                    |
|                                                         |                                                         |                             |                                             |                                                              | 37 (0.69 mM)                                            | 37 (0.82 mM)                    |
|                                                         |                                                         |                             |                                             |                                                              | 37 (1.38 mM)                                            | 38 (1.72 mM)                    |
| <i>D<sub>max</sub></i> [Å]                              | 101 (0.64 mM)                                           | 140 (0.54 mM)               | 107 (0.04 mM)                               | 200                                                          | 115 (0.08 mM)                                           | 120 (0.09 mM)                   |
|                                                         |                                                         | 152 (1.53 mM)               | 151 (0.79 mM)                               |                                                              | 125 (0.19 mM)                                           | 130 (0.27 mM)                   |
|                                                         |                                                         |                             | 152 (1.96 mM)                               |                                                              | 130 (0.37 mM)                                           | 140 (0.47 mM)                   |
|                                                         |                                                         |                             |                                             |                                                              | 140 (0.69 mM)                                           | 140 (0.82 mM)                   |
|                                                         |                                                         |                             |                                             |                                                              | 140 (1.38 mM)                                           | 140 (1.72 mM)                   |
| <i>M<sub>w</sub></i> (RALLS) [kDa]                      | n.a.                                                    | n.a.                        | n.a.                                        | 70                                                           | n.a.                                                    | n.a.                            |
| <i>M<sub>w</sub></i> (DATMOV) [kDa]                     | 24.3 (0.64 mM)                                          | 31.2 (0.54 mM)              | 27.3 (0.04 mM)                              | 63.7                                                         | 30.8 (0.08 mM)                                          | 29.1 (0.09 mM)                  |
|                                                         |                                                         | 44.7 (1.53 mM)              | 44.7 (0.79 mM)                              |                                                              | 30.7 (0.19 mM)                                          | 31.9 (0.27 mM)                  |
|                                                         |                                                         |                             | 58.1 (1.96 mM)                              |                                                              | 33.7 (0.37 mM)                                          | 35.6 (0.47 mM)                  |
|                                                         |                                                         |                             |                                             |                                                              | 37.8 (0.69 mM)                                          | 40.6 (0.82 mM)                  |
|                                                         |                                                         |                             |                                             |                                                              | 43.2 (1.38 mM)                                          | 45.7 (1.72 mM)                  |

(continued)

(continued)

| Construct                                                | Ig1Ig2 <sup>250-444*</sup>   | Ig1Ig2 <sup>250-498</sup> | Ig1Ig2 <sup>220-452</sup> | Trx-MYOT         | Ig1Ig2 <sup>220-452†</sup>   | Ig1Ig2 <sup>220-452 R405K</sup> |
|----------------------------------------------------------|------------------------------|---------------------------|---------------------------|------------------|------------------------------|---------------------------------|
| M <sub>w</sub> from Porod volume [kDa]                   | 21.4 (0.64 mM)               | 26.4 (0.54 mM)            | 27.5 (0.04 mM)            | 77.3             | 26.9 (0.08 mM)               | 24.5 (0.09 mM)                  |
|                                                          |                              | 37.9 (1.53 mM)            | 36.7 (0.79 mM)            |                  | 25.9 (0.19 mM)               | 26.3 (0.27 mM)                  |
|                                                          |                              |                           | 48.2 (1.96 mM)            |                  | 28.3 (0.37 mM)               | 29.6 (0.47 mM)                  |
|                                                          |                              |                           |                           |                  | 30.9 (0.69 mM)               | 33.6 (0.82 mM)                  |
|                                                          |                              |                           |                           |                  | 36.2 (1.38 mM)               | 38.2 (1.72 mM)                  |
| M <sub>w</sub> (monomer sequence) [kDa] <sup>&amp;</sup> | 21.9                         | 28.0                      | 26.5                      | 69.7             | 26.5                         | 26.5                            |
| <b>Software employed</b>                                 |                              |                           |                           |                  |                              |                                 |
| Primary data red.                                        | SaxsAnalysis pipeline system |                           |                           | SASFLOW          | SaxsAnalysis pipeline system |                                 |
| Data processing                                          | PRIMUS                       |                           |                           | PRIMUS / Cromixs | PRIMUS                       |                                 |
| Calculation and comparison of scattering data            | Crysol / Oligomer            |                           |                           |                  | n. a.                        |                                 |
| <i>Ab initio</i> modelling                               | DAMMIF                       |                           |                           |                  | n. a.                        |                                 |
| Addition of missing residues                             | CORAL                        |                           |                           |                  | n. a.                        |                                 |
| Ensemble modelling                                       | EOM                          |                           |                           |                  | n. a.                        |                                 |
| SASDB accession code                                     | SASDF38                      | SASDF48                   | SASDF28                   | SASDFZ7          |                              |                                 |

<sup>\*</sup>, the data for Ig1Ig2<sup>250-444</sup> were already measured and described previously (Puz et al., 2017)

<sup>§</sup>, for Ig1Ig2<sup>250-498</sup> and Ig1Ig2<sup>220-452</sup> structural parameters at various concentrations, relevant for the comparison, were calculated separately

<sup>&</sup>, M<sub>w</sub> (monomer sequence) denotes molecular weight calculated from the amino acid sequence of the monomeric species

<sup>†</sup>, measured at the same experimental settings/conditions as Ig1Ig2<sup>220-452 R405K</sup>

**Table S2: List of major cross-links found between myotilin and F-actin (using DMTMM)**

| Myotilin constructs used |              | (A)  |            | (B)  |                              | (C)  |  |
|--------------------------|--------------|---------------------------------------------------------------------------------------|------------|---------------------------------------------------------------------------------------|------------------------------|-----------------------------------------------------------------------------------------|--|
| From Protein             | From Residue | To Protein                                                                            | To Residue | Myotilin region                                                                       | Myotilin fragment identified | Score                                                                                   |  |
| myotilin                 | K 474        | actin                                                                                 | E 102      | C-ter.                                                                                | C                            | 212.6                                                                                   |  |
| myotilin                 | K 462        | actin                                                                                 | D 27       | C-ter.                                                                                | C                            | 199.5                                                                                   |  |
| myotilin                 | K 411        | actin                                                                                 | D 27*      | Ig2                                                                                   | A, B                         | A) 157.5, B) 175.5                                                                      |  |
| myotilin                 | K 469        | actin                                                                                 | E 102      | C-ter.                                                                                | C                            | 169.4                                                                                   |  |
| myotilin                 | D 236        | actin                                                                                 | K 330      | N-ter.                                                                                | B, C                         | B) 138.4, C) 76.2                                                                       |  |
| myotilin                 | D 236        | actin                                                                                 | K 328*     | N-ter.                                                                                | B                            | 134.9                                                                                   |  |
| myotilin                 | K 246        | actin                                                                                 | E 336      | N-ter.                                                                                | B, C                         | B) 105.9, C) 111.2                                                                      |  |
| myotilin                 | E 245        | actin                                                                                 | K 330      | N-ter.                                                                                | B                            | 107.1                                                                                   |  |
| myotilin                 | K 246        | actin                                                                                 | D 26       | N-ter.                                                                                | C                            | 106.3                                                                                   |  |
| myotilin                 | K 452        | actin                                                                                 | D 27*      | C-ter.                                                                                | C                            | 103.9                                                                                   |  |
| myotilin                 | D 241        | actin                                                                                 | K 330*     | N-ter.                                                                                | B                            | 102.4                                                                                   |  |
| myotilin                 | K 469        | actin                                                                                 | D 26*      | C-ter.                                                                                | C                            | 102.0                                                                                   |  |
| myotilin                 | K 452        | actin                                                                                 | D 26       | C-ter.                                                                                | C                            | 100.9                                                                                   |  |
| myotilin                 | D 239        | actin                                                                                 | K 330*     | N-ter.                                                                                | B                            | 97.0                                                                                    |  |
| myotilin                 | D 239        | actin                                                                                 | K 328      | N-ter.                                                                                | B                            | 88.1                                                                                    |  |
| myotilin                 | K 474        | actin                                                                                 | D 27       | C-ter.                                                                                | C                            | 84.6                                                                                    |  |
| myotilin                 | K 474        | actin                                                                                 | E 336*     | C-ter.                                                                                | C                            | 82.7                                                                                    |  |
| myotilin                 | D 241        | actin                                                                                 | K 328*     | N-ter.                                                                                | B                            | 78.2                                                                                    |  |
| myotilin                 | K 462        | actin                                                                                 | D 26*      | C-ter.                                                                                | C                            | 77.7                                                                                    |  |
| myotilin                 | K 354        | actin                                                                                 | D 27*      | Ig2                                                                                   | C                            | 76.7                                                                                    |  |
| myotilin                 | K 246        | actin                                                                                 | D 27*      | N-ter.                                                                                | B, C                         | B) 54.5, C) 73.9                                                                        |  |
| myotilin                 | K 415        | actin                                                                                 | D 27       | Ig2                                                                                   | A, B                         | A) 66.1, B) 57.6                                                                        |  |
| myotilin                 | K 303        | actin                                                                                 | D 27*      | Ig1                                                                                   | A                            | 65.9                                                                                    |  |
| myotilin                 | K 367        | actin                                                                                 | D 365      | Ig2                                                                                   | B                            | 63.6                                                                                    |  |
| myotilin                 | K 367        | actin                                                                                 | E 366      | Ig2                                                                                   | B                            | 60.2                                                                                    |  |
| myotilin                 | K 452        | actin                                                                                 | E 363      | C-ter.                                                                                | C                            | 48.2                                                                                    |  |
| myotilin                 | K 411        | actin                                                                                 | D 26       | Ig2                                                                                   | A                            | 47.8                                                                                    |  |
| myotilin                 | K 474        | actin                                                                                 | D 26       | C-ter.                                                                                | C                            | 35.4                                                                                    |  |

\*, cross-links shown on [Figure 3A](#); N-ter., region flanking Ig1Ig2 N-terminally; C-ter., region flanking Ig1Ig2 C-terminally; Score, computed as  $-10 \log_{10}$  (E-value) representing best identification for a crosslink pair. The higher values of the score indicate more reliable identifications.

**Table S3: List of constructs**

| Name                                           | <sup>(1)</sup> Protein | Residues  | Mutations           | Vector     | <sup>(2)</sup> Tag                 | Expression in  | Origin                     |
|------------------------------------------------|------------------------|-----------|---------------------|------------|------------------------------------|----------------|----------------------------|
| <b>Trx-MYOT</b>                                | myotilin               | 1-498     | -                   | pETM-20    | N-Trx-His <sub>6</sub> -TEV        | <i>E. coli</i> | this study                 |
| <b>Trx-MYOT-NEECK</b>                          | myotilin               | 1-498     | F96E, L97E, L101E   | pETM-20    | N-Trx-His <sub>6</sub> -TEV        | <i>E. coli</i> | this study                 |
| <b>Ig1Ig2<sup>185-498</sup></b>                | myotilin               | 185-498   | -                   | pETM-20    | N-Trx-His <sub>6</sub> -3C C-Strep | <i>E. coli</i> | this study                 |
| <b><sup>(3)</sup>Ig1Ig2<sup>185-498*</sup></b> | myotilin               | 185-498   | -                   | pDB-HisGST | N-His <sub>6</sub> -GST-TEV        | <i>E. coli</i> | this study                 |
| <b>Ig1Ig2<sup>220-452</sup></b>                | myotilin               | 220-452   | -                   | pETM-14    | N-His <sub>6</sub> -3C             | <i>E. coli</i> | this study                 |
| <b>Ig1Ig2<sup>220-452 R405K</sup></b>          | myotilin               | 220-452   | R405K               | pETM-14    | N-His <sub>6</sub> -3C             | <i>E. coli</i> | this study                 |
| <b><sup>(4)</sup>Ig1Ig2<sup>250-498</sup></b>  | myotilin               | 250-498   | -                   | pETM-14    | N-His <sub>6</sub> -3C             | <i>E. coli</i> | this study                 |
| <b>Ig1Ig2<sup>250-444</sup></b>                | myotilin               | 250-444   | -                   | pETM-14    | N-His <sub>6</sub> -3C             | <i>E. coli</i> | Puz et al., 2017           |
| <b>Ig1Ig2<sup>K354A</sup></b>                  | myotilin               | 250-444   | K354A               | pETM-14    | N-His <sub>6</sub> -3C             | <i>E. coli</i> | this study                 |
| <b>Ig1Ig2<sup>Q356A</sup></b>                  | myotilin               | 250-444   | Q356A               | pETM-14    | N-His <sub>6</sub> -3C             | <i>E. coli</i> | this study                 |
| <b>Ig1Ig2<sup>K358A</sup></b>                  | myotilin               | 250-444   | K358A               | pETM-14    | N-His <sub>6</sub> -3C             | <i>E. coli</i> | this study                 |
| <b>Ig1Ig2<sup>K359A</sup></b>                  | myotilin               | 250-444   | K359A               | pETM-14    | N-His <sub>6</sub> -3C             | <i>E. coli</i> | this study                 |
| <b>Ig1Ig2<sup>K367A</sup></b>                  | myotilin               | 250-444   | K367A               | pETM-14    | N-His <sub>6</sub> -3C             | <i>E. coli</i> | this study                 |
| <b>Ig1Ig2<sup>R405K</sup></b>                  | myotilin               | 250-444   | R405K               | pETM-14    | N-His <sub>6</sub> -3C             | <i>E. coli</i> | this study                 |
| <b>Ig1Ig2<sup>K411A</sup></b>                  | myotilin               | 250-444   | K411A               | pETM-14    | N-His <sub>6</sub> -3C             | <i>E. coli</i> | this study                 |
| <b>Ig1Ig2<sup>K354/359A</sup></b>              | myotilin               | 250-444   | K354A, K359A        | pETM-14    | N-His <sub>6</sub> -3C             | <i>E. coli</i> | this study                 |
| <b>Ig1Ig2<sup>K354/358/359A</sup></b>          | myotilin               | 250-444   | K354A, K358A, K359A | pETM-14    | N-His <sub>6</sub> -3C             | <i>E. coli</i> | this study                 |
| <b>Ig1<sup>250-344</sup></b>                   | myotilin               | 250-344   | -                   | pET-3d(+)  | N-His <sub>6</sub> -TEV            | <i>E. coli</i> | this study                 |
| <b>Ig2<sup>349-459</sup></b>                   | myotilin               | 349-459   | -                   | pET-3d(+)  | N-His <sub>6</sub> -TEV            | <i>E. coli</i> | this study                 |
| <b>MYOT<sup>WT</sup></b>                       | myotilin               | 1-498     | -                   | pEGFP-N1   | N-EGFP                             | C2C12          | this study                 |
| <b>MYOT<sup>K354A</sup></b>                    | myotilin               | 1-498     | K354A               | pEGFP-N1   | N-EGFP                             | C2C12          | this study                 |
| <b>MYOT<sup>K359A</sup></b>                    | myotilin               | 1-498     | K359A               | pEGFP-N1   | N-EGFP                             | C2C12          | this study                 |
| <b>MYOT<sup>K354/359A</sup></b>                | myotilin               | 1-498     | K354A, K359A        | pEGFP-N1   | N-EGFP                             | C2C12          | this study                 |
| <b>MYOT<sup>K354/358/359A</sup></b>            | myotilin               | 1-498     | K354A, K358A, K359A | pEGFP-N1   | N-EGFP                             | C2C12          | this study                 |
| <b>ACTN2-WT</b>                                | $\alpha$ -actinin-2    | 1-894     | -                   | pET-3d(+)  | N-His <sub>6</sub> -TEV            | <i>E. coli</i> | Ribeiro et al., 2014       |
| <b>ACTN2-NEECK</b>                             | $\alpha$ -actinin-2    | 1-894     | R268E, I269E, L273E | pET-3d(+)  | N-His <sub>6</sub> -TEV            | <i>E. coli</i> | Ribeiro et al., 2014       |
| <b>ACTN2-EF14</b>                              | $\alpha$ -actinin-2    | 746-894   | -                   | pETM-14    | N-His <sub>6</sub> -3C             | <i>E. coli</i> | this study                 |
| <b>palladin Ig3</b>                            | palladin               | 1022-1126 | -                   | pTBSG      | N-His <sub>6</sub> -TEV            | <i>E. coli</i> | Yadav et al., 2016         |
| <b>Doc2b</b>                                   | Doc2b                  | 125-412   | -                   | pGEX4T1    | N-GST-Thr                          | <i>E. coli</i> | Groffen et al., 2010       |
| <b>DVD-actin</b>                               | actin-5C               | 1-376     | D287A, V288A, D289A | pFastBacHT | N-His <sub>6</sub>                 | <i>Sf9</i>     | Zahm et al., 2013          |
| <b>tropomyosin</b>                             | tropomyosin            |           |                     |            |                                    | <i>E. coli</i> | von der Ecken et al., 2015 |

(1), myotilin (human, Uniprot-ID Q9UBF9);  $\alpha$ -actinin-2 (human, P35609), palladin (Mus musculus, Q9ET54), Doc2b (Rattus norvegicus, P70610), actin-5C (Drosophila melanogaster, P10987), tropomyosin (Tpm1.1st, Homo sapiens, NP\_001018005.1)

(2), in many cases removed during purification; N, N-terminal fusion; Trx, Thioredoxin-tag; His<sub>6</sub>, 6xHis-tag, TEV; TEV protease cleavage site; 3C, HRV-3C protease cleavage site; C, C-terminal fusion; Strep, Strep-tag II; Thr, thrombin cleavage site, GST, Glutathione s-transferase-tag; EGFP, Enhanced green fluorescent protein-tag

(3), Ig1Ig2<sup>185-498\*</sup> was used to produce Ig1Ig2<sup>185-454</sup>, and GST

(4), Ig1Ig2<sup>250-498</sup> was used to produce Ig1Ig2<sup>250-466</sup>
